# Supplementary material for: Being Silenced, Loneliness and Being Heard: understanding pathways to Intimate Partner Violence &amp; Abuse in young adults. A mixed-methods study
Source: Research Square preprint supplement (doi:10.21203/rs.3.rs-1542724/v1), 2022-04-28
Supplement: Supplementary file 2 [file 6843039c66fb6eb01b7cdb06.docx]

**Supplementary Table 1: Distribution of characteristics in study cohort (n=2127 females, 1145 males) v full ALSPAC cohort* (n= 7,333 females, 7,697 males)**

|  | **Females** |  |  |  | **Males** |  |  |  |
| --- | --- | --- | --- | --- | --- | --- | --- | --- |
| **Variable (age that variable covers)** | **Study cohort** |  | **ALSPAC** |  | **Study cohort** |  | **ALSPAC** |  |
| Maternal age at delivery | 29 | 26 to 32 | 27 | 24 to 31 | 29 | 26 to 33 | 28 | 24 to 31 |
| Maternal parity at delivery |  |  |  |  |  |  |  |  |
| 0 | 930 | (43.7) | 2844 | (38.8) | 567 | (49.3) | 2980 | (38.7) |
| 1 | 705 | (33.1) | 2202 | (30.0) | 346 | (30.1) | 2363 | (30.7) |
| 2 | 248 | (11.6) | 882 | (12.0) | 133 | (11.6) | 984 | (12.8) |
| 3+ | 83 | (3.9) | 372 | (5.1) | 35 | (3.0) | 404 | (5.2) |
| Missing | 163 | (7.7) | 1033 | (14.1) | 69 | (6.0) | 966 | (12.6) |
| Maternal education (highest qualification) |  |  |  |  |  |  |  |  |
| <O-level | 344 | (16.2) | 1767 | (24.1) | 153 | (13.3) | 1935 | (25.1) |
| O-level | 675 | (31.7) | 2062 | (28.1) | 344 | (29.9) | 2205 | (28.6) |
| A-level | 528 | (24.8) | 1348 | (18.4) | 321 | (27.9) | 1421 | (18.5) |
| Degree or above | 396 | (18.6) | 785 | (10.7) | 258 | (22.4) | 798 | (10.4) |
| Missing | 186 | (8.7) | 1371 | (18.7) | 74 | (6.4) | 1338 | (17.4) |
| Household social class, highest of mother or partner (insert time-point) |  |  |  |  |  |  |  |  |
| 1 – Lowest | 338 | (15.9) | 723 | (9.9) | 244 | (21.2) | 799 | (10.4) |
| 2 | 868 | (40.8) | 2332 | (31.8) | 483 | (42) | 2432 | (31.6) |
| 3 (non-managerial) | 442 | (20.8) | 1418 | (19.3) | 227 | (19.7) | 1496 | (19.4) |
| 3 (managerial) | 166 | (7.8) | 740 | (10.1) | 60 | (5.2) | 798 | (10.4) |
| 4 or 5 – Highest | 62 | (2.9) | 339 | (4.6) | 20 | (1.7) | 337 | (4.4) |
| Missing | 253 | (11.9) | 1781 | (24.3) | 116 | (10.1) | 1835 | (23.8) |
| Single parent household (insert time-point) |  |  |  |  |  |  |  |  |
| No | 1905 | (89.5) | 5879 | (80.2) | 1054 | (91.7) | 6309 | (82) |
| Yes | 70 | (3.3) | 374 | (5.1) | 26 | (2.3) | 364 | (4.7) |
| Missing | 154 | (7.2) | 1080 | (14.7) | 70 | (6.1) | 1024 | (13.3) |
| Ethnicity (birth**) |  |  |  |  |  |  |  |  |
| White | 1866 | (94.6) | 5582 | (92.1) | 1040 | (95.7) | 5927 | (91.6) |
| Person of Colour | 77 | (3.9) | 295 | (4.9) | 35 | (3.2) | 316 | (4.9) |
| Missing | 30 | (1.5) | 187 | (3.1) | 12 | (1.1) | 231 | (3.6) |
| Sexual orientation (15.5y) |  |  |  |  |  |  |  |  |
| 100% heterosexual | 1286 | (60.6) | 2313 | (32.6) | 780 | (67.8) | 2161 | (28.6) |
| Not 100% heterosexual | 196 | (9.2) | 368 | (5.2) | 89 | (7.7) | 206 | (2.7) |
| Missing | 639 | (30.1) | 4421 | (62.3) | 281 | (24.4) | 5177 | (68.6) |

Data presented as counts (column %s), or median (IQR)

*After removing multiple births and those with missing sex.

**Augmented by school census responses at 9-13 years old.
